# Supplementary material for: Achieving high-performance energy harvesting and self-powered sensing in a flexible cellulose nanofibril/MoS2/BaTiO3 composite piezoelectric nanogenerator
Source: Royal Society of Chemistry journal article supplement (doi:10.1039/d1tc03886a), 2021-01-01
Supplement: d1tc03886a1.pdf [file d1tc03886a1.pdf]

## Supplementary Information

### **Achieving high-performance energy harvesting and self-powered sensing in flexible cellulose nanofibril/MoS<sub>2</sub>/BaTiO<sub>3</sub> composite piezoelectric nanogenerators**

Menghan Xu,<sup>a</sup> Tao Wu,<sup>a</sup> Yiheng Song,<sup>a</sup> Ming Jiang,<sup>\*b</sup> Zhuqun Shi,<sup>ac</sup> Chuanxi Xiong<sup>a</sup> and Quanling Yang<sup>\*a</sup>

*\* Corresponding authors*

<sup>a</sup> *School of Materials Science and Engineering, Wuhan University of Technology, Wuhan 430070, P. R. China. E-mail: yangql@whut.edu.cn*

<sup>b</sup> *State Key Lab for New Textile Materials & Advanced Processing Technology, School of Materials Science and Engineering, Wuhan Textile University, Wuhan 430200, P. R. China. E-mail: mjiang@wtu.edu.cn*

<sup>c</sup> *School of Chemistry, Chemical Engineering and Life Sciences, Wuhan University of Technology, Wuhan 430070, P. R. China*

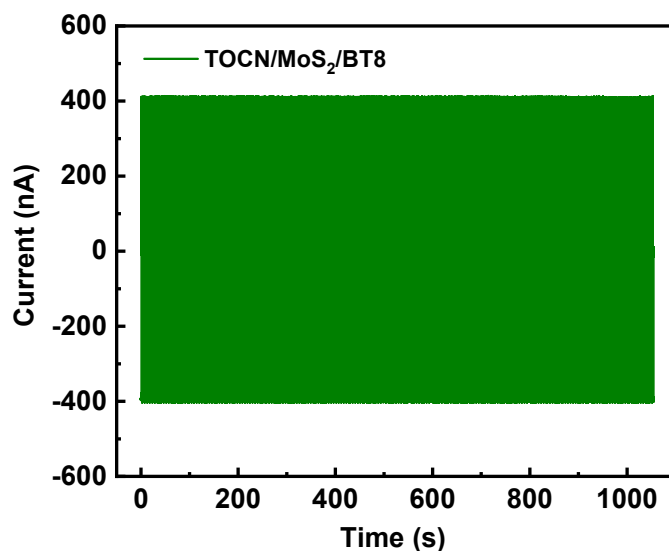

**Fig. S1** Durability of short-circuit current for the TOCN/MoS<sub>2</sub>/BT8 composite film-based PENG.
